# Supplementary material for: Candida albicans selection for human commensalism results in substantial within-host diversity without decreasing fitness for invasive disease
Source: PubMed Central journal article supplement (PMC10234564; doi:10.1371/journal.pbio.3001822), 2023-05-19

Fig 3C raw blot

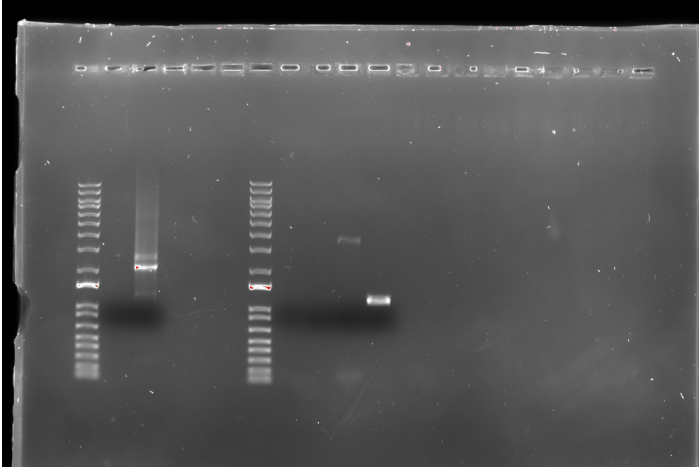

S3 Fig raw blots

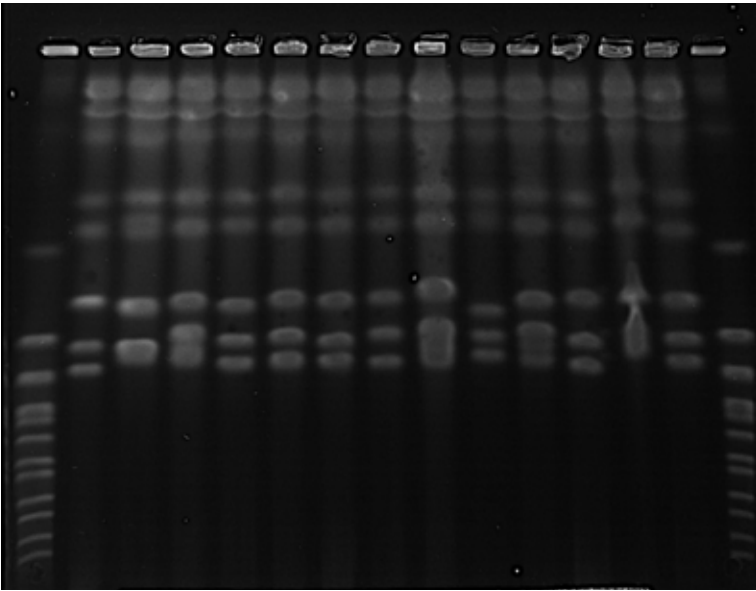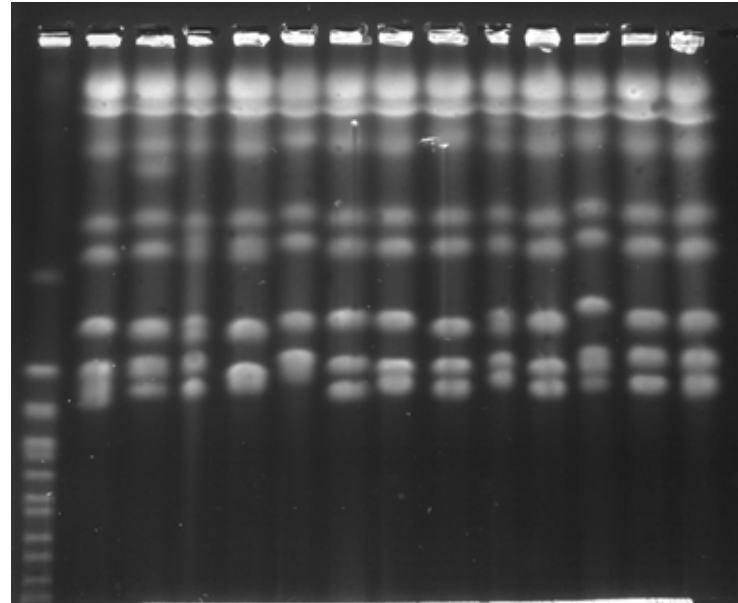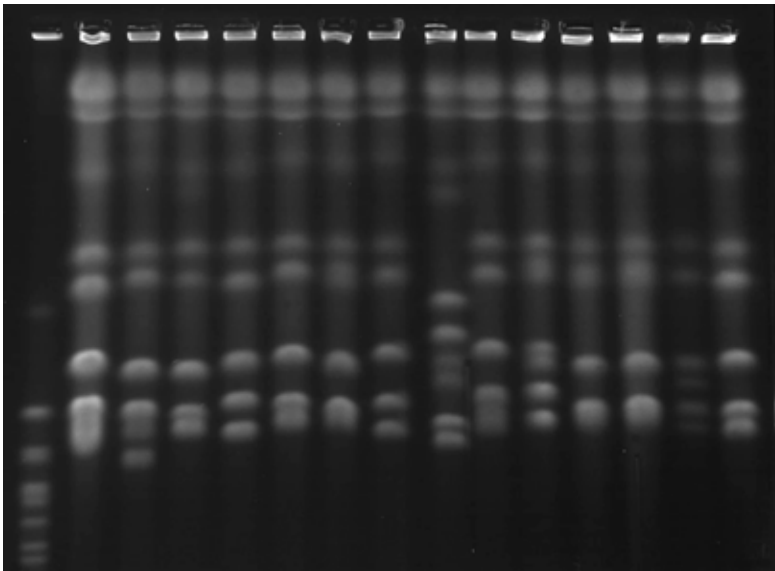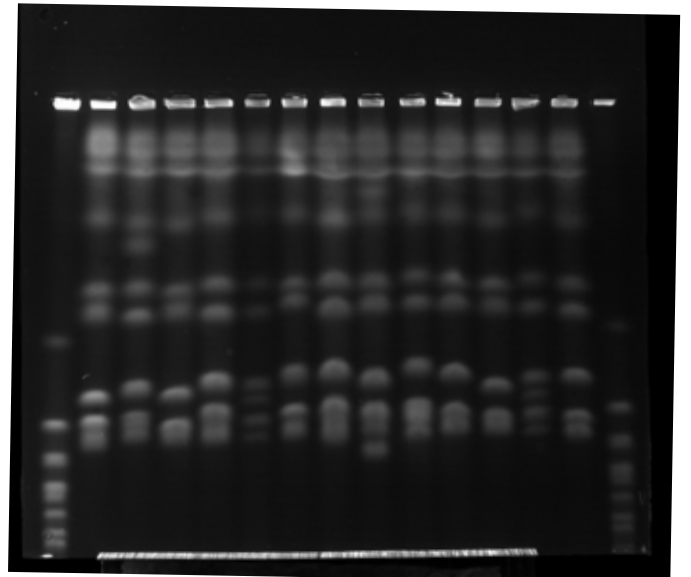

Supplement: pbio.3001822.s015.pdf [file pbio.3001822.s015.pdf]
